# Supplementary material for: Duration of Lactation and Maternal Risk of Metabolic Syndrome: A Systematic Review and Meta-Analysis
Source: MDPI journal article supplement (doi:10.3390/nu12092718), 2020-09-05
Supplement: s1 [file s1]

The Joanna Briggs' Checklist for Cross-Sectional Studies

| Author, year | Were the criteria for inclusion in the sample clearly defined? | Were the study subjects and the setting described in detail? | Was the exposure measured in a valid and reliable way? | Were objective, standard criteria used for measurement of the condition? | Were confounding factors identified? | Were strategies to deal with confounding factors stated? | Were the outcomes measured in a valid and reliable way? | Was appropriate statistical analysis used? |
|--------------|----------------------------------------------------------------|--------------------------------------------------------------|--------------------------------------------------------|--------------------------------------------------------------------------|--------------------------------------|----------------------------------------------------------|---------------------------------------------------------|--------------------------------------------|
| Yu, 2019     | Yes                                                            | Yes                                                          | Yes                                                    | Yes                                                                      | Yes                                  | Yes                                                      | Yes                                                     | Yes                                        |
| Ki, 2017     | Unclear                                                        | Unclear                                                      | Yes                                                    | Yes                                                                      | Yes                                  | Yes                                                      | Unclear                                                 | Yes                                        |
| Cho, 2009    | Yes                                                            | Unclear                                                      | Yes                                                    | Yes                                                                      | Unclear                              | Unclear                                                  | Yes                                                     | Yes                                        |
| Ram, 2008    | Yes                                                            | Yes                                                          | Yes                                                    | Yes                                                                      | Unclear                              | Unclear                                                  | Yes                                                     | Yes                                        |
| Cohen, 2006  | Unclear                                                        | Yes                                                          | Yes                                                    | Yes                                                                      | Yes                                  | Yes                                                      | Yes                                                     | Yes                                        |
| Moradi, 2016 | Unclear                                                        | Unclear                                                      | Yes                                                    | Yes                                                                      | Unclear                              | Unclear                                                  | Yes                                                     | Yes                                        |
| Kim, 2016    | Unclear                                                        | Unclear                                                      | Yes                                                    | Yes                                                                      | Yes                                  | Yes                                                      | Yes                                                     | Yes                                        |
| Choi, 2017   | Yes                                                            | Unclear                                                      | Yes                                                    | YEs                                                                      | Yes                                  | Yes                                                      | Yes                                                     | Yes                                        |

The Joanna Briggs' Checklist for Cohort Studies

| Author, year    | Were the groups similar and recruited from the same population? | Were the exposures measured similarly to assign people to both exposed and unexposed groups? | Was the exposure measured in a valid and reliabe way? | Were confunding factors identified? | Were strategies to deal whit confunding factors stated? | Were the groups/participants free of the outcome at the start of the study? | Were the outcomes measured in a valid and reliable way? | Was the follo-up time reported and sufficient to be long enough for outcome to occur? | Was the follow-up complete, and if not, were the reasons to loss to follow-up described and explored? | Were strategies to address incomplete follow-up utilized? | Was appropriate statistical analysis used? |
|-----------------|-----------------------------------------------------------------|----------------------------------------------------------------------------------------------|-------------------------------------------------------|-------------------------------------|---------------------------------------------------------|-----------------------------------------------------------------------------|---------------------------------------------------------|---------------------------------------------------------------------------------------|-------------------------------------------------------------------------------------------------------|-----------------------------------------------------------|--------------------------------------------|
| Gundersen, 2010 | Yes                                                             | Yes                                                                                          | Yes                                                   | Yes                                 | Yes                                                     | Yes                                                                         | Yes                                                     | Yes                                                                                   | Yes                                                                                                   | NA                                                        | Yes                                        |
| Thearani, 2014  | Unclear                                                         | Yes                                                                                          | Yes                                                   | Unclear                             | Unclear                                                 | Yes                                                                         | Yes                                                     | Yes                                                                                   | Unclear                                                                                               | Unclear                                                   | Yes                                        |
